1  
2  
3  
4  
5  
6  
7  
8  
9  
10  
11  
12  
13  
14  
15  
16  
17  
18  
19  
20

## **Cigarette smoking and personality:**

### **Investigating causality using Mendelian randomization**

Hannah M Sallis<sup>1,2,3,4</sup>, George Davey Smith<sup>1,3</sup>, Marcus R Munafò<sup>1,2</sup>

1. MRC Integrative Epidemiology Unit at the University of Bristol, Bristol, United Kingdom.
2. UK Centre for Tobacco and Alcohol Studies, School of Experimental Psychology, University of Bristol, Bristol, United Kingdom.
3. Population Health Sciences, Bristol Medical School, University of Bristol, Bristol, United Kingdom.
4. Centre for Academic Mental Health, Population Health Sciences, Bristol Medical School, University of Bristol, Bristol, United Kingdom.

(Word count: 3862)

### **Financial support**

This work was supported by the Medical Research Council and the University of Bristol (MC\_UU\_12013/1, MC\_UU\_12013/6). MRM and HMS are members of the UK Centre for Tobacco and Alcohol Studies, a UKCRC Public Health Research: Centre of Excellence.

21  
22  
23  
24  
25  
26  
27  
28  
29  
30  
31  
32  
33  
34  
35  
36  
37  
38  
39  
40  
41  
42  
43  
44  
45  
46

## Abstract

**Background:** Despite the well-documented association between smoking and personality traits such as neuroticism and extraversion, little is known about the potential causal nature of these findings. If it were possible to unpick the association between personality and smoking, it may be possible to develop more targeted smoking cessation programmes that could lead to both improved uptake and efficacy.

**Methods:** Recent genome-wide association studies (GWAS) have identified variants robustly associated with both smoking phenotypes and personality traits. Here we use publicly available GWAS summary statistics in addition to data from UK Biobank to investigate the link between smoking and personality. We first estimated genetic overlap between traits using LD score regression and then applied both one- and two-sample Mendelian randomization methods to unpick the nature of this relationship.

**Results:** We found clear evidence of a modest genetic correlation between smoking behaviours and both neuroticism and extraversion, suggesting shared genetic aetiology. We found some evidence to suggest an association between neuroticism and increased smoking initiation. We also found some evidence that personality traits appear to be causally linked to certain smoking phenotypes: higher neuroticism and heavier cigarette consumption, and higher extraversion and increased odds of smoking initiation. The latter finding could lead to more targeted smoking prevention programmes.

**Conclusion:** The association between neuroticism and cigarette consumption lends support to the self-medication hypothesis, while the association between extraversion and smoking initiation could lead to more targeted smoking prevention programmes.

47 **Cigarette smoking and personality:**  
48 **Investigating causality using Mendelian randomization**

49  
50 **Introduction**

51 There is a well-documented association between smoking and personality traits such  
52 as neuroticism and extraversion (Terracciano & Costa Jr. 2004; Malouff *et al.* 2006; Munafò  
53 *et al.* 2007; Hakulinen *et al.* 2015), and with associated mental health outcomes such as  
54 major depressive disorder (MDD) (Munafò & Araya 2010; Fluharty *et al.* 2017). However,  
55 given that much of these data come from observational studies, it is difficult to make any  
56 causal inference regarding these relationships. It is possible that the observed associations  
57 could be due to confounding, and if a true causal relationship does exist the direction of  
58 effect is unknown.

59 Although we now know that smoking has a causal effect on mortality, there has  
60 previously been some discussion surrounding this. It had been suggested by Eysenck and  
61 others that personality influences both mortality and smoking independently, and that this  
62 leads to a non-causal association between smoking and mortality (Eysenck 1965). Much  
63 work went into investigating the Type A personality type, which was argued to be a risk  
64 factor for coronary heart disease and other health outcomes, although many of these  
65 findings failed to replicate (Petticrew *et al.* 2012).

66 Understanding these relationships is therefore important for public health and policy.  
67 The World Health Organisation (WHO) now recognises smoking as one of the leading  
68 modifiable risk factors for disability, disease and death (World Health Organisation 2002). As  
69 a result, if it were possible to unpick the association between personality and smoking, it  
70 may be possible to develop more targeted smoking cessation programmes, which could lead  
71 to both improved uptake and efficacy. It has also been suggested that personality traits are  
72 potential modifiable targets for intervention. Understanding the nature of these associations  
73 could therefore lead to novel interventions addressing the specific traits associated with  
74 smoking behaviours (Roberts & Hill 2017).

75           Neuroticism and extraversion are two of the main components of personality. The  
76 former reflects emotional instability, stress-vulnerability and proneness to anxiety (Kendler *et al.*  
77 *et al.* 1993). Higher neuroticism has been linked to anxiety and MDD, with some evidence of  
78 shared genetics and a causal link between neuroticism and MDD onset (Neale *et al.* 2005;  
79 Gale *et al.* 2016). Although levels of neuroticism are increased among smokers, the  
80 evidence that neuroticism is linked with smoking initiation is inconsistent, with one meta-  
81 analysis suggesting that neuroticism is linked with relapse to smoking among former  
82 smokers (Hakulinen *et al.* 2015) rather than smoking initiation. In contrast, extraversion is  
83 characterised by tendencies such as liveliness and assertiveness of an individual and the  
84 level of ease and enjoyment of social interactions (Kendler *et al.* 1993; van den Berg *et al.*  
85 2016). There is some suggestion in the literature that high levels of extraversion are  
86 associated with greater rates of smoking initiation, and lower rates of smoking cessation  
87 (Hakulinen *et al.* 2015).

88           Mendelian randomization (MR) is a method of assessing causality from observational  
89 data through the use of genetic instrumental variables (Sallis *et al.* 2014). Genetic variants  
90 (or scores constructed from several variants) are used as a proxy for some modifiable risk  
91 factor, for example smoking (Figure 1). The MR principle relies on an approximation of  
92 Mendel's first and second laws: that genotypes transmit across conception to a viable  
93 conceptus, independent of both environment and other genetic variants (Davey Smith 2011).  
94 Assuming the genetic variants are not associated with the outcome other than through the  
95 risk factor they act as a proxy for, we can make inferences about the causal direction of any  
96 association between the risk factor and the outcome (Davey Smith & Ebrahim 2003). If the  
97 underlying assumptions of MR are satisfied, the resulting effects given by the MR analysis  
98 should be free from the problems of confounding and reverse causality to which  
99 observational epidemiology is prone (Sallis *et al.* 2014).

100           Previous work using MR found no evidence of a causal relationship in the direction of  
101 smoking to depression (Taylor *et al.* 2014). We therefore hypothesised that if a causal  
102 association with neuroticism exists, it is more likely to act from neuroticism to smoking.

103 Methods have also been developed to investigate genetic correlation between traits.  
104 Although these do not provide information on causality of any potential relationship, they  
105 shed light on the amount of shared genetic architecture across traits. Any overlap here could  
106 be due to pleiotropy (genetic effects on multiple traits), shared biological mechanisms  
107 between traits, or a causal relationship from one trait to another but the direction of this  
108 cannot be ascertained from these approaches. Pleiotropy can be either biological, with  
109 variants associated with multiple independent traits, or mediated, where variants are  
110 associated with multiple phenotypes on the same causal pathway (Solovieff *et al.* 2013).  
111 Recent genome-wide association studies (GWAS) have identified variants robustly  
112 associated with a number of smoking phenotypes (The Tobacco and Genetics Consortium  
113 2010) and with personality traits (Okbay *et al.* 2016; van den Berg *et al.* 2016). The  
114 availability of these summary statistics enables us to look at the extent of genetic correlation  
115 between smoking phenotypes and personality. This can be followed up by a range of MR  
116 methods to try and to unpick the nature of this relationship. Here we use publicly available  
117 GWAS summary statistics in addition to data from UK Biobank (UKB) (Sudlow *et al.* 2015) in  
118 a bidirectional analysis to investigate whether there appears to be a causal link between  
119 smoking and personality.

120

## 121 **Methods and measures**

122 MR techniques using both genome-wide summary statistics and individual level data  
123 were used to investigate whether observed associations between smoking and personality  
124 traits are causal.

125

### 126 **Genetic instruments**

127 *Smoking behaviours.* For each of the smoking phenotypes, a single variant was used  
128 as a genetic instrument for this behaviour. These were the rs6265 variant in the *BDNF* gene  
129 identified for smoking initiation, the rs16969968 variant in the *CHRNA5* gene for smoking  
130 heaviness among past and current smokers, and the rs3025343 variant in the *DBH* gene for

131 smoking cessation. For each phenotype, the effect allele was that which corresponded to an  
132 increase in the relevant smoking behaviour.

133 *Personality.* Eleven independent variants associated with neuroticism were reported  
134 by Okbay et al. (2016) Of the original variants, 5 of these were unavailable in the TAG  
135 smoking data. Proxies were identified for 4 of these SNPs using SNIPA (Arnold *et al.* 2015)  
136 ( $r^2 > 0.85$ ). A complete list of variants used in the neuroticism instrument can be found in  
137 Table S1. Five independent variants associated with extraversion were identified by the GPC  
138 (van den Berg *et al.* 2016). Of these variants, 3 variants were unavailable in the TAG  
139 summary statistics. Using SNIPA, we identified a proxy for one of these variants (Table S1).

140

#### 141 **Data sources**

142 *GWAS summary statistics.* Publicly available summary statistics are available for  
143 recent genome-wide analyses of both smoking phenotypes and personality traits. The  
144 Tobacco and Genetics (TAG) consortium performed GWAS on several measures related to  
145 cigarette smoking, including smoking initiation, cessation and heaviness (The Tobacco and  
146 Genetics Consortium 2010). The consortium identified several hits, including rs6265 in the  
147 *BDNF* gene for smoking initiation, rs16969968 in the *CHRNA5* gene for smoking heaviness  
148 and rs3025343 in the *DBH* gene for smoking cessation. A recent GWAS investigating  
149 subjective well-being, depression and neuroticism identified 11 independent variants  
150 associated with neuroticism (Okbay *et al.* 2016), while 5 variants associated with  
151 extraversion were reported by the Genetic of Personality Consortium (GPC) (van den Berg  
152 *et al.* 2016).

153 *UK Biobank (UKB).* UKB has collected phenotypic information on around 500,000  
154 participants, with genotyping available on approximately 337,106 unrelated Europeans,  
155 exclusion criteria and quality control measures are described in detail elsewhere (Bycroft *et al.*  
156 2017; Mitchell *et al.* 2017) . An interim release of genetic data was made available in  
157 2015 for a subset of the cohort. This subset was included in the neuroticism GWAS and  
158 contained approximately 114,780 European individuals (Sudlow *et al.* 2015).

159 Smoking status was defined as ever (consisting of current and former smokers) or  
160 never smoker according to responses given at the initial assessment visit in UKB. Smoking  
161 heaviness was derived for former and current smokers based on responses to 'number of  
162 cigarettes currently smoked daily' at the initial assessment. For former smokers, this  
163 question related to number of cigarettes previously smoked daily.

164 Neuroticism scores were derived from a number of neurotic behaviour domains  
165 measured at the initial assessment visit. These scores were externally derived by Smith et  
166 al. (2013) and are available for use by researchers accessing the UKB resource. Scores  
167 range from 0 to 12 with a higher score corresponding to a greater number of neurotic  
168 behaviours. There was no direct measure of extraversion in UKB, so analyses of this trait  
169 were restricted to those based on the genetic instrument for extraversion.

170 Polygenic risk scores for neuroticism and extraversion were calculated for each  
171 individual in UKB. The neuroticism risk score ranged from 1 to 19 and corresponded to the  
172 number of neuroticism increasing alleles per individual. A risk score was calculated for  
173 extraversion and ranged from 0 to 6. Although weighted scores can give a more precise  
174 effect estimate, the neuroticism GWAS included the interim release of UKB within the  
175 discovery sample (Okbay *et al.* 2016; Major Depressive Disorder Working Group of the PGC  
176 *et al.* 2017). Risk scores should use weightings derived from independent samples to avoid  
177 introducing bias into the effect estimates (Hartwig & Davies 2016). As a sensitivity analysis,  
178 we restricted analyses using the neuroticism risk score to participants who were not included  
179 in the interim release of the genetic data, and who were therefore not included in the  
180 discovery sample.

181

## 182 **Statistical analysis**

183 *Genetic correlation.* In a first step, GWAS summary statistics were used to estimate  
184 the genetic correlation of smoking initiation with both neuroticism and extraversion. LD score  
185 regression was performed (without constraining the intercept) using the GWAS summary  
186 statistics to assess the amount of genetic overlap between the two traits. In order to estimate

187 genetic correlation between personality measures and additional smoking phenotypes of  
188 smoking heaviness and cessation, summary statistics for the personality GWAS would need  
189 to be stratified by smoking status. Although the original GWAS summary statistics were not  
190 available stratified by smoking status, it was possible to estimate these genetic correlations  
191 using the individual level data available in UKB. Genome-wide complex trait analysis (GCTA)  
192 software (Yang *et al.* 2011) was used to estimate genetic correlation for the additional  
193 smoking phenotypes within UKB.

194 *Two-sample MR using summary statistics.* Bidirectional two-sample MR analyses  
195 were performed using the genetic instruments described above. Effect estimates and  
196 standard errors (SEs) were extracted for each variant from the relevant GWAS results and  
197 used to estimate inverse variance weighted (IVW) effect estimates. For the neuroticism  
198 instrument which incorporated multiple SNPs, we performed sensitivity analyses. Effect  
199 estimates and SEs were extracted from the original GWAS results as described above and  
200 MR-Egger (Bowden *et al.* 2015) and weighted median regression (Bowden *et al.* 2016)  
201 approaches were used to calculate effect estimates adjusted for pleiotropy and invalid  
202 instruments. Neuroticism and extraversion GWAS results were not stratified by smoking  
203 status. As a result, when using summary statistics, analyses in the direction of smoking to  
204 personality were restricted to smoking initiation only.

205 *One-sample MR using individual level data.* Further analyses were performed using  
206 data from the UKB. In these analyses, the association between the genetic instrument (G)  
207 and the outcome (Y) was estimated ( $Y \sim G$ ). Within UKB it was possible to stratify participants  
208 according to smoking status. Therefore, in addition to smoking initiation, we also investigated  
209 the association between both smoking heaviness and cessation with personality. These  
210 analyses were adjusted for the top 10 principal components as well as genotype array.

211

212

## Results

213

### Genetic correlation



214 LD score regression using summary statistics from the TAG consortium GWAS of  
215 smoking initiation and the Okbay et al. neuroticism GWAS suggested evidence of a modest  
216 genetic correlation between the two traits ( $r_G=0.124$ ,  $SE=0.05$ ). There was also evidence of a  
217 larger genetic correlation between extraversion and smoking initiation ( $r_G=0.288$ ,  $SE=0.01$ ;  
218 Table 1). We used GCTA software to calculate genetic correlation using individual level data  
219 from UKB. There was evidence of genetic correlation between neuroticism and smoking  
220 heaviness among both current ( $r_G=0.248$ ,  $SE=0.12$ ) and former smokers ( $r_G=0.220$ ,  
221  $SE=0.06$ ). We found evidence of a negative genetic correlation between smoking cessation  
222 and neuroticism ( $r_G=-0.314$ ,  $SE=0.15$ ; Table 1).

223

#### 224 **Observational association between neuroticism and smoking behaviours**

225 Data on smoking status and neuroticism were available from UKB. A total of 389,770  
226 participants had data available on both smoking and neuroticism, with genotyping available  
227 on 273,516 of these after applying QC measures. There was strong evidence of an  
228 observational association between neuroticism and smoking status in both the entire UKB  
229 sample and when restricting to those with genotyping data. Mean neuroticism scores were  
230 higher among former (4.22,  $SD=3.3$ ) and current smokers (4.66,  $SD=3.5$ ) than non-smokers  
231 (3.89,  $SD=3.2$ ,  $p<0.001$ ). We found evidence of an association between neuroticism and  
232 cigarettes smoked per day with heavier smokers reporting greater levels of neuroticism  
233 ( $\beta=0.02$ ,  $p<0.001$ ).

234

#### 235 **Effects of smoking on personality traits**

236 We first used two-sample MR to investigate the effect of smoking initiation on  
237 personality using publicly available GWAS summary statistics. This found no clear evidence  
238 of a relationship from smoking initiation to neuroticism when using rs6265 as an instrument  
239 for smoking initiation ( $\beta=-0.032$ , 95% CI: -0.16, 0.09,  $p=0.617$ ; Table 2). A one-sample  
240 approach was also used to investigate the association between each smoking behaviour and  
241 neuroticism in UKB. This found weak evidence of association, with each copy of the smoking

242 initiation risk allele associated with a decrease in neuroticism score ( $\beta=-0.023$ , 95% CI: -  
243 0.045, -0.001,  $p=0.037$ ; Table 2).

244 The genetic variant rs16969968 was used as a proxy for smoking heaviness in UKB.  
245 Despite strong evidence of an observational association between smoking heaviness and  
246 neuroticism, we found no robust evidence of a causal association from the rs16969968  
247 variant for smoking heaviness to neuroticism among either former or current smokers (Table  
248 2). Using the rs3025343 variant as a proxy for smoking cessation found no strong evidence  
249 of an association from smoking cessation to neuroticism ( $\beta=0.029$ , 95% CI: -0.01, 0.07,  
250  $p=0.161$ ; Table 2) in UKB.

251 When looking at the association between extraversion and smoking, we found weak  
252 evidence of an association between smoking initiation and increased extraversion ( $\beta=0.198$ ,  
253 95% CI: -0.03, 0.42; Table 2) using two-sample MR. There was no relevant measure of  
254 extraversion in UKB, so we were unable to look at the association from smoking initiation to  
255 extraversion using individual level data in UKB.

256

### 257 **Effects of personality traits on smoking**

258 Two-sample MR using summary statistics found no clear evidence of an association  
259 from neuroticism to smoking initiation (OR=1.165, 95% CI: 0.71, 1.91,  $p=0.499$ ; Table 3).

260 Several MR approaches were used to investigate the association from neuroticism to  
261 smoking initiation. MR-Egger and weighted median approaches found no robust evidence of  
262 an association after adjusting for pleiotropy and allowing for invalid instruments (Table S2).

263 Among the UKB participants, there was no clear evidence of an association from neuroticism  
264 to smoking initiation when using an unweighted risk score (OR=1.000, 95% CI: 0.997, 1.003,  
265  $p=0.980$ ; Table 3). When looking at the association from extraversion to smoking initiation,  
266 we found no strong evidence of an effect when using a two-sample approach (OR=1.733,  
267 95% CI: 0.37, 8.23,  $p=0.268$ ). However, this may be due to a lack of power. The direction of  
268 effect was consistent within the UKB sample, where there was strong evidence of an

269 association. Each additional extraversion allele was associated with an increase in the odds  
270 of being an ever smoker (OR=1.015, 95% CI: 1.01, 1.02,  $p=9.6 \times 10^{-7}$ ; Table 3).

271 Using an IVW approach, we found no clear evidence of an association from  
272 neuroticism to smoking heaviness ( $\beta=0.050$ , 95% CI: -4.11, 4.21,  $p=0.979$ ; Table 3).  
273 However, MR-Egger suggested some evidence of biological pleiotropy ( $\beta=-0.500$ ,  $p=0.026$ ;  
274 Table S2) and a bias adjusted estimate suggested some evidence of an association  
275 between neuroticism and increased smoking heaviness ( $\beta=22.55$ ,  $p=0.027$ ). We also looked  
276 at this association in UKB when stratifying according to smoking status and found some  
277 evidence of an association. Among current smokers, the neuroticism risk score was  
278 associated with increased smoking heaviness ( $\beta=0.068$ , 95% CI: 0.02, 0.12,  $p=0.009$ ; Table  
279 3). In this analysis, each additional neuroticism risk allele was associated with smoking an  
280 extra 0.07 cigarettes per day. We found no robust evidence of an association from  
281 extraversion to smoking heaviness when using a two-sample MR approach ( $\beta =0.017$ , 95%  
282 CI: -16.33, 16.37,  $p=0.997$ ; Table 3) or when stratifying on smoking status and investigating  
283 this association in UKB. This remained the case among both former ( $\beta=-0.021$ , 95% CI: -  
284 0.08, 0.04,  $p=0.519$ ) and current smokers ( $\beta=-0.038$ , 95% CI: -0.13, 0.05,  $p=0.419$ ; Table 3).

285 When using two-sample MR with summary statistics, we found no robust evidence of  
286 association between neuroticism and smoking cessation when using the IVW approach, or  
287 when adjusting for bias (Tables 3, S2). This remained the case when looking within UKB  
288 (OR=0.997, 95% CI: 0.99, 1.00,  $p=0.272$ ; Table 3). There was no strong evidence of an  
289 effect from extraversion to smoking cessation when using two-sample MR with summary  
290 statistics (OR=0.586, 95% CI: 0.07, 4.76,  $p=0.387$ ; Table 3). When restricting our analyses  
291 to current and former smokers within UKB, we found weak evidence of an association. Each  
292 additional increase in extraversion risk allele was associated with 1.1% lower odds of  
293 smoking cessation ( $p=0.057$ ; Table 3).

294

295 **Sensitivity analyses**

296 Analyses involving neuroticism were also performed restricting to participants whose  
297 genetic data was not included in the interim release of UKB data. Full results are reported in  
298 Table S3. Results remained largely consistent. In this subset, the strength of evidence for  
299 the effect of neuroticism on smoking heaviness was weakened (current smokers:  $\beta=0.053$ ,  
300  $p=0.120$ ). However, the effect size remained consistent, so this may be due to a lack of  
301 power in this smaller sample.

302

303

### Discussion

304 We attempted to disentangle the relationship between smoking and the personality  
305 traits of neuroticism and extraversion. Although much of the observed association between  
306 smoking and personality appears to be non-causal, we found evidence of a modest genetic  
307 correlation with both neuroticism and extraversion, suggesting some shared genetic  
308 aetiology. Given that available GWAS summary statistics for neuroticism and extraversion  
309 are not stratified by smoking status, we initially used two-sample MR approaches to look at  
310 the bidirectional association with smoking initiation. This was followed by one-sample MR  
311 using individual level data from UKB. When looking at the association from smoking to  
312 personality, we found some evidence that the rs6265 variant for smoking initiation was  
313 associated with both decreased neuroticism and increased extraversion. When looking in the  
314 other direction, we found evidence that the neuroticism risk score was associated with  
315 increased smoking heaviness, and that the extraversion risk score was associated with  
316 increased smoking initiation and decreased smoking cessation.

317 Both two-sample MR and one-sample analyses in UKB found consistent effects of  
318 the smoking initiation instrument (rs6265) on lowering neuroticism scores, although the  
319 evidence for this was weak. Although this is a strong instrument for smoking initiation, there  
320 could be potential pleiotropic effects. The inclusion of several strongly associated, but  
321 independent variants could reduce the potential impact of these effects, as all pleiotropic  
322 effects would need to operate in the same direction (Gage *et al.* 2017). Analyses from  
323 personality to smoking behaviours found some evidence of an association between

324 increased genetic liability for neuroticism and greater smoking heaviness using one-sample  
325 MR and two-sample MR after adjusting for biological pleiotropy. Both the observational and  
326 MR analyses found a stronger effect among current smokers, where at least part of this  
327 association appears to be a causal effect. The observed association between smoking  
328 initiation and a decrease in neuroticism scores, plus the association between increased  
329 levels of neuroticism and heavier smoking would appear to lend support to the self-  
330 medication hypothesis.

331         We also observed evidence of an association between extraversion and smoking.  
332 Unlike neuroticism, extraversion did not show evidence of a causal relationship with smoking  
333 heaviness, but we did find an association with smoking initiation. Although there was no  
334 strong evidence of an association when using a two-sample approach, this could be due to a  
335 lack of power given that the direction of effect was consistent with that observed in UKB.  
336 Using UKB data, there was evidence that individuals with a higher genetic liability for  
337 extraversion had greater odds of taking up smoking. One potential mechanism for this is that  
338 extraversion could lead to more social contacts and greater susceptibility to peer influences,  
339 which are known to be important in smoking initiation. These findings could be taken forward  
340 to develop novel interventions. If self-medication does contribute to the smoking behaviours  
341 of individuals, as suggested by these results, it seems likely that targeting relevant  
342 personality traits, in addition to addressing the ensuing smoking behaviours could result in  
343 increased efficacy of any intervention.

344         There are a number of limitations to our analysis that should be considered. First,  
345 UKB formed a large part of the discovery cohort for the GWAS of neuroticism. We were  
346 therefore unable to use weighted risk scores to assess the association between smoking  
347 phenotypes and neuroticism in our one sample analyses – weights should be identified in  
348 independent samples to avoid overfitting the data and introducing bias into effect estimates  
349 (Hartwig & Davies 2016). However, we performed sensitivity analyses restricting to  
350 individuals who were not included in the discovery samples, and results remained  
351 consistent. Second, we were unable to use two-sample methods to assess the association

352 from smoking heaviness and cessation to neuroticism and extraversion because the  
353 personality summary statistics were not stratified by smoking status. However, we did  
354 investigate the association in both directions for neuroticism when using the UKB data. Both  
355 the two-sample and UKB analyses gave consistent results when looking at the neuroticism  
356 to smoking initiation relationship. Third, due to the lack of an extraversion phenotype  
357 currently available in UKB we were unable to investigate whether there was evidence of an  
358 effect from smoking to extraversion. Fourth, MR analyses can often suffer from a lack of  
359 power, with large sample sizes and strong instruments required to detect effects. We have  
360 identified genetic variants robustly associated with each trait of interest based on results of  
361 large recently published GWAS in order to maximise the strength of our instruments. In this  
362 analysis, we use a combination of one- and two-sample MR approaches based on GWAS  
363 summary statistics in addition to data from UKB in order to maximise our power to detect any  
364 effect. Fifth, we stratified on smoking status to investigate the association of smoking  
365 heaviness and cessation phenotypes. Although this allows us to investigate pleiotropy, there  
366 is the potential to introduce collider bias (Munafò *et al.* 2017). However, our instruments are  
367 principally associated with smoking heaviness and cessation rather than smoking initiation,  
368 so that the risk of collider bias is minimised (Gage *et al.* 2016).

369 In conclusion, we found evidence of modest genetic correlation with both neuroticism  
370 and extraversion, suggesting some shared genetic aetiology and implying that much of the  
371 observed association between smoking and personality is non-causal. However, we also  
372 found some evidence for specific causal pathways between personality and smoking  
373 phenotypes - higher neuroticism and heavier cigarette consumption, and higher extraversion  
374 and increased odds of smoking initiation. The association between neuroticism and cigarette  
375 consumption lends support to the self-medication hypothesis, while the association between  
376 extraversion and smoking initiation could lead to more targeted smoking prevention  
377 programmes.

378

379

380

### **Conflict of interest**

381 None.

382

## References

- 383 **Arnold M, Raffler J, Pfeufer A, Suhre K, Kastenmüller G** (2015). SNiPA: an interactive,  
384 genetic variant-centered annotation browser. . Oxford University Press *Bioinformatics* **31**,  
385 1334–1336.
- 386 **van den Berg SM, de Moor MHM, Verweij KJH, Krueger RF, Luciano M, Arias Vasquez**  
387 **A, Matteson LK, Derringer J, Esko T, Amin N, Gordon SD, Hansell NK, Hart AB,**  
388 **Seppälä I, Huffman JE, Konte B, Lahti J, Lee M, Miller M, Nutile T, Tanaka T, Teumer A,**  
389 **Viktorin A, Wedenoja J, Abdellaoui A, Abecasis GR, Adkins DE, Agrawal A, Allik J,**  
390 **Appel K, Bigdeli TB, Busonero F, Campbell H, Costa PT, Davey Smith G, Davies G, de**  
391 **Wit H, Ding J, Engelhardt BE, Eriksson JG, Fedko IO, Ferrucci L, Franke B, Giegling I,**  
392 **Grucza R, Hartmann AM, Heath AC, Heinonen K, Henders AK, Homuth G, Hottenga J-**  
393 **J, Iacono WG, Janzing J, Jokela M, Karlsson R, Kemp JP, Kirkpatrick MG, Latvala A,**  
394 **Lehtimäki T, Liewald DC, Madden PAF, Magri C, Magnusson PKE, Marten J, Maschio**  
395 **A, Mbarek H, Medland SE, Mihailov E, Milaneschi Y, Montgomery GW, Nauck M, Nivard**  
396 **MG, Ouwens KG, Palotie A, Pettersson E, Polasek O, Qian Y, Pulkki-Råback L,**  
397 **Raitakari OT, Realo A, Rose RJ, Ruggiero D, Schmidt CO, Slutske WS, Sorice R, Starr**  
398 **JM, St Pourcain B, Sutin AR, Timpson NJ, Trochet H, Vermeulen S, Vuoksimaa E,**  
399 **Widen E, Wouda J, Wright MJ, Zgaga L, Porteous D, Minelli A, et al.** (2016). Meta-  
400 analysis of Genome-Wide Association Studies for Extraversion: Findings from the Genetics  
401 of Personality Consortium. . Springer US *Behavior Genetics* **46**, 170–182.
- 402 **Bowden J, Davey Smith G, Burgess S** (2015). Mendelian randomization with invalid  
403 instruments: effect estimation and bias detection through Egger regression. *International*  
404 *journal of epidemiology* **44**, 512–25.
- 405 **Bowden J, Davey Smith G, Haycock PC, Burgess S** (2016). Consistent Estimation in  
406 Mendelian Randomization with Some Invalid Instruments Using a Weighted Median  
407 Estimator. *Genetic epidemiology* **40**, 304–14.
- 408 **Bycroft C, Freeman C, Petkova D, Band G, Elliott LT, Sharp K, Motyer A, Vukcevic D,**  
409 **Delaneau O, O’Connell J, Cortes A, Welsh S, McVean G, Leslie S, Donnelly P, Marchini**



- 410 **J** (2017). Genome-wide genetic data on ~500,000 UK Biobank participants. . Cold Spring  
411 Harbor Laboratory *bioRxiv*, 166298.
- 412 **Davey Smith G** (2011). Use of genetic markers and gene-diet interactions for interrogating  
413 population-level causal influences of diet on health. *Genes & nutrition* **6**, 27–43.
- 414 **Davey Smith G, Ebrahim S** (2003). “Mendelian randomization”: can genetic epidemiology  
415 contribute to understanding environmental determinants of disease? *International Journal of*  
416 *Epidemiology* **32**, 1–22.
- 417 **Eysenck HJ** (1965). *Smoking, Health and Personality*. Basic Books: New York, NY.
- 418 **Fluharty M, Taylor AE, Grabski M, Munafò MR** (2017). The Association of Cigarette  
419 Smoking With Depression and Anxiety: A Systematic Review. . Oxford University Press  
420 *Nicotine & tobacco research : official journal of the Society for Research on Nicotine and*  
421 *Tobacco* **19**, 3–13.
- 422 **Gage SH, Davey Smith G, Ware JJ, Flint J, Munafò MR, Koifman R** (2016). G = E: What  
423 GWAS Can Tell Us about the Environment. Ed. G Gibson . McGraw-Hill Book Company Inc  
424 *PLOS Genetics* **12**, e1005765.
- 425 **Gage SH, Jones HJ, Taylor AE, Burgess S, Zammit S, Munafò MR** (2017). Investigating  
426 causality in associations between smoking initiation and schizophrenia using Mendelian  
427 randomization. . Nature Publishing Group *Scientific Reports* **7**, 40653.
- 428 **Gale CR, Hagenaars SP, Davies G, Hill WD, Liewald DCM, Cullen B, Penninx BW,**  
429 **International Consortium for Blood Pressure GWAS CCA and LG, Boomsma DI, Pell J,**  
430 **McIntosh AM, Smith DJ, Deary IJ, Harris SE** (2016). Pleiotropy between neuroticism and  
431 physical and mental health: findings from 108 038 men and women in UK Biobank. . United  
432 States *Translational psychiatry* **6**, e791.
- 433 **Hakulinen C, Hintsanen M, Munafò MR, Virtanen M, Kivimäki M, Batty GD, Jokela M**  
434 (2015). Personality and smoking: individual-participant meta-analysis of nine cohort studies.  
435 *Addiction* **110**, 1844–1852.
- 436 **Hartwig FP, Davies NM** (2016). Why internal weights should be avoided (not only) in MR-  
437 Egger regression. . Oxford University Press *International Journal of Epidemiology* **45**, 1676–

438 1678.

439 **Kendler KS, Neale MC, Kessler RC, Heath AC, Eaves LJ** (1993). A longitudinal twin study  
440 of personality and major depression in women. *Archives of general psychiatry* **50**, 853–62.

441 **Major Depressive Disorder Working Group of the PGC, Wray NR, Sullivan PF** (2017).  
442 Genome-wide association analyses identify 44 risk variants and refine the genetic  
443 architecture of major depression. *bioRxiv*

444 **Malouff JM, Thorsteinsson EB, Schutte NS** (2006). The five-factor model of personality  
445 and smoking: A meta-analysis. *J. Drug Education* **36**, 47–58.

446 **Mitchell R, Hemani G, Dudding T, Paternoster L** (2017). UK Biobank Genetic Data: MRC-  
447 IEU Quality Control, Version 1. <https://doi.org/10.5523/bris.3074krb6t2frj29yh2b03x3wxj>

448 **Munafò MR, Araya R** (2010). Cigarette smoking and depression: a question of causation. .  
449 The Royal College of Psychiatrists *The British journal of psychiatry : the journal of mental*  
450 *science* **196**, 425–6.

451 **Munafò MR, Tilling K, Taylor AE, Evans DM, Davey Smith G** (2017). Collider scope:  
452 when selection bias can substantially influence observed associations. *International Journal*  
453 *of Epidemiology*

454 **Munafò MR, Zetteler JI, Clark TG** (2007). Personality and smoking status: A meta-analysis.  
455 *Nicotine & Tobacco* **9**, 405–413.

456 **Neale BM, Sullivan PF, Kendler KS** (2005). A genome scan of neuroticism in nicotine  
457 dependent smokers. . Wiley Subscription Services, Inc., A Wiley Company *American Journal*  
458 *of Medical Genetics Part B: Neuropsychiatric Genetics* **132B**, 65–69.

459 **Okbay A, Baselmans BML, De Neve J-E, Turley P, Nivard MG, Fontana MA, Meddens**  
460 **SFW, Linnér RK, Rietveld CA, Derringer J, Gratten J, Lee JJ, Liu JZ, de Vlaming R,**  
461 **Ahluwalia TS, Buchwald J, Cavadino A, Frazier-Wood AC, Furlotte NA, Garfield V,**  
462 **Geisel MH, Gonzalez JR, Haitjema S, Karlsson R, van der Laan SW, Ladwig K-H, Lahti**  
463 **J, van der Lee SJ, Lind PA, Liu T, Matteson L, Mihailov E, Miller MB, Minica CC, Nolte**  
464 **IM, Mook-Kanamori D, van der Most PJ, Oldmeadow C, Qian Y, Raitakari O, Rawal R,**  
465 **Realo A, Ruedi R, Schmidt B, Smith A V, Stergiakouli E, Tanaka T, Taylor K,**

466 **Wedenoja J, Wellmann J, Westra H-J, Willems SM, Zhao W, Amin N, Bakshi A, Boyle**  
467 **PA, Cherney S, Cox SR, Davies G, Davis OSP, Ding J, Direk N, Eibich P, Emeny RT,**  
468 **Fatemifar G, Faul JD, Ferrucci L, Forstner A, Gieger C, Gupta R, Harris TB, Harris JM,**  
469 **Holliday EG, Hottenga J-J, De Jager PL, Kaakinen MA, Kajantie E, Karhunen V, Kolcic**  
470 **I, Kumari M, Launer LJ, Franke L, Li-Gao R, Koini M, Loukola A, Marques-Vidal P,**  
471 **Montgomery GW, Mosing MA, Paternoster L, Pattie A, Petrovic KE, Pulkki-Råback L,**  
472 **Quaye L, Räikkönen K, Rudan I, Scott RJ, Smith JA, Sutin AR, et al. (2016). Genetic**  
473 **variants associated with subjective well-being, depressive symptoms, and neuroticism**  
474 **identified through genome-wide analyses. *Nature genetics* **48**, 624–633.**  
475 **Petticrew MP, Lee K, McKee M (2012). Type A behavior pattern and coronary heart**  
476 **disease: Philip Morris’s ‘Crown Jewel’. . American Public Health Association *American***  
477 ***Journal of Public Health* **102**, 2018–25.**  
478 **Roberts B, Hill P (2017). Questions and Answers About the Policy Relevance of**  
479 **Personality. . PsyArXiv**  
480 **Sallis H, Steer C, Paternoster L, Davey Smith G, Evans J (2014). Perinatal depression**  
481 **and omega-3 fatty acids: A Mendelian randomisation study. . Elsevier *Journal of Affective***  
482 ***Disorders* **166**, 124–131.**  
483 **Smith DJ, Nicholl BI, Cullen B, Martin D, Ul-Haq Z, Evans J, Gill JMR, Roberts B,**  
484 **Gallacher J, Mackay D, Hotopf M, Deary I, Craddock N, Pell JP (2013). Prevalence and**  
485 **Characteristics of Probable Major Depression and Bipolar Disorder within UK Biobank:**  
486 **Cross-Sectional Study of 172,751 Participants. Ed. JB Potash . Public Library of Science**  
487 ***PLoS ONE* **8**, e75362.**  
488 **Solovieff N, Cotsapas C, Lee PH, Purcell SM, Smoller JW (2013). Pleiotropy in complex**  
489 **traits: challenges and strategies. . Nature Research *Nature Reviews Genetics* **14**, 483–495.**  
490 **Sudlow C, Gallacher J, Allen N, Beral V, Burton P, Danesh J, Downey P, Elliott P,**  
491 **Green J, Landray M, Liu B, Matthews P, Ong G, Pell J, Silman A, Young A, Sprosen T,**  
492 **Peakman T, Collins R, Clayton D, McKeigue P, Willett W, Blot W, Colditz G, Folsom A,**  
493 **Henderson B, Stampfer M, Collins F, Manolio T, Doll R, Peto R, Ollier W, Sprosen T,**

494 **Peakman T, Burton P, Hansell A, Fortier I, Manolio T, Khoury M, Hattersley A,**  
495 **McCarthy M, Collins R, Elliott P, Peakman T, Liu B, Young H, Crowe F, Benson V,**  
496 **Spencer E, Clarke R, Shipley M, Lewington S, Youngman L, Collins R, Pell J, Valentine**  
497 **J, Inskip H, Downey P, Peakman T, Manolio T, Barbour V, Manolio T, Collins R (2015).**  
498 UK Biobank: An Open Access Resource for Identifying the Causes of a Wide Range of  
499 Complex Diseases of Middle and Old Age. . Public Library of Science *PLOS Medicine* **12**,  
500 e1001779.

501 **Taylor AE, Fluharty ME, Børngaard JH, Gabrielsen ME, Skorpen F, Marioni RE,**  
502 **Campbell A, Engmann J, Mirza SS, Loukola A, Laatikainen T, Partonen T, Kaakinen M,**  
503 **Ducci F, Cavadino A, Husemoen LLN, Ahluwalia TS, Jacobsen RK, Skaaby T, Ebstrup**  
504 **JF, Mortensen EL, Minica CC, Vink JM, Willemsen G, Marques-Vidal P, Dale CE,**  
505 **Amuzu A, Lennon LT, Lahti J, Palotie A, Räikkönen K, Wong A, Paternoster L, Wong**  
506 **AP-Y, Horwood LJ, Murphy M, Johnstone EC, Kennedy MA, Pausova Z, Paus T, Ben-**  
507 **Shlomo Y, Nohr EA, Kuh D, Kivimaki M, Eriksson JG, Morris RW, Casas JP, Preisig M,**  
508 **Boomsma DI, Linneberg A, Power C, Hyppönen E, Veijola J, Jarvelin M-R, Korhonen T,**  
509 **Tiemeier H, Kumari M, Porteous DJ, Hayward C, Romundstad PR, Davey Smith G,**  
510 **Munafò MR (2014).** Investigating the possible causal association of smoking with  
511 depression and anxiety using Mendelian randomisation meta-analysis: the CARTA  
512 consortium. *BMJ Open* **4**, e006141.

513 **Terracciano A, Costa Jr. PT (2004).** Smoking and the Five-Factor Model of personality. .  
514 NIH Public Access *Addiction* **99**, 472–81.

515 **The Tobacco and Genetics Consortium (2010).** Genome-wide meta-analyses identify  
516 multiple loci associated with smoking behavior. *Nature Genetics* **42**

517 **World Health Organisation (2002).** The World Health Report 2002 - Reducing risks,  
518 promoting healthy life. *Geneva: World Health Organization*

519 **Yang J, Lee SH, Goddard ME, Visscher PM (2011).** GCTA: a tool for genome-wide  
520 complex trait analysis. *Am J Hum Genet* **88**, 76–82.

521

Table 1. Genetic correlation between smoking phenotypes and personality traits using GWAS summary statistics and individual level data from UK Biobank.

|                                                                        | <b>r<sub>G</sub> (SE)</b> | <b>p-value</b>       |
|------------------------------------------------------------------------|---------------------------|----------------------|
| <b>Neuroticism and smoking initiation<sup>1</sup></b>                  | 0.124 (0.05)              | 0.008                |
| <b>Extraversion and smoking initiation<sup>1</sup></b>                 | 0.288 (0.01)              | 0.001                |
| <b>Neuroticism and smoking heaviness (current smokers)<sup>2</sup></b> | 0.248 (0.12)              | 0.013                |
| <b>Neuroticism and smoking heaviness (former smokers)<sup>2</sup></b>  | 0.220 (0.06)              | 1.8x10 <sup>-5</sup> |
| <b>Neuroticism and smoking cessation<sup>2</sup></b>                   | -0.314 (0.15)             | 0.002                |

<sup>1</sup> Genetic correlation estimates for smoking initiation were generated using GWAS summary statistics

<sup>2</sup> Estimates for smoking heaviness and cessation were generated using individual level data from UK Biobank

Table 2. Effect of smoking on personality traits using one- and two-sample MR.

| <b>Exposure</b>           | <b>Outcome</b>      | <b>Sample</b>           | <b>Instrument</b> | <b>Smoking status</b> | <b><math>\beta</math></b> | <b>95% CI</b>  | <b>P-value</b> | <b>N</b> |
|---------------------------|---------------------|-------------------------|-------------------|-----------------------|---------------------------|----------------|----------------|----------|
| <b>Smoking initiation</b> | <b>Neuroticism</b>  | GWAS summary statistics | rs6265            | All                   | -0.032                    | -0.16, 0.09    | 0.617          | 170,911  |
|                           |                     | UK Biobank              |                   | All                   | -0.023                    | -0.045, -0.001 | 0.037          | 274,230  |
|                           | <b>Extraversion</b> | GWAS summary statistics | rs6265            | All                   | 0.198                     | -0.03, 0.42    | 0.084          | 63,030   |
|                           |                     | UK Biobank              |                   |                       | -                         | -              | -              | -        |
| <b>Smoking heaviness</b>  | <b>Neuroticism</b>  | UK Biobank              |                   | Non-smokers           | 0.004                     | -0.02, 0.03    | 0.745          | 149,960  |
|                           |                     |                         |                   | Former smokers        | 0.011                     | -0.02, 0.04    | 0.472          | 96,674   |
|                           |                     |                         |                   | Current smokers       | 0.038                     | -0.02, 0.10    | 0.234          | 26,882   |
| <b>Smoking cessation</b>  | <b>Neuroticism</b>  | UK Biobank              |                   | Non-smokers           | 0.004                     | -0.03, 0.04    | 0.822          | 149,960  |
|                           |                     |                         |                   | Ever smokers          | 0.029                     | -0.01, 0.07    | 0.161          | 123,556  |

Table 3. Effect of personality traits on smoking using one- and two-sample MR.

| <b>Exposure</b>     | <b>Outcome</b>            | <b>Sample</b>           | <b>Instrument</b> | <b>Smoking status</b> | <b>OR</b> | <b>95% CI</b> | <b>P-value</b>       | <b>N</b> |
|---------------------|---------------------------|-------------------------|-------------------|-----------------------|-----------|---------------|----------------------|----------|
| <b>Neuroticism</b>  | <b>Smoking initiation</b> | GWAS summary statistics | IVW               | All                   | 1.165     | 0.71, 1.91    | 0.499                | 74,035   |
|                     |                           | UK Biobank              | Unweighted score  | All                   | 1.000     | 0.997, 1.003  | 0.980                | 318,985  |
| <b>Extraversion</b> | <b>Smoking initiation</b> | GWAS summary statistics | IVW               | All                   | 1.733     | 0.37, 8.23    | 0.268                | 74,035   |
|                     |                           | UK Biobank              | Unweighted score  | All                   | 1.015     | 1.01, 1.02    | 9.6x10 <sup>-7</sup> | 332,596  |
|                     |                           |                         |                   |                       | <b>β</b>  | <b>95% CI</b> | <b>P-value</b>       | <b>N</b> |
| <b>Neuroticism</b>  | <b>Smoking heaviness</b>  | GWAS summary statistics | IVW               | Ever smokers          | 0.050     | -4.11, 4.21   | 0.979                | 38,181   |
|                     |                           | UK Biobank              | Unweighted score  | Former smokers        | -0.018    | -0.05, 0.02   | 0.315                | 70,909   |
|                     |                           |                         |                   | Current smokers       | 0.068     | 0.02, 0.12    | 0.009                | 21,449   |
| <b>Extraversion</b> | <b>Smoking heaviness</b>  | GWAS summary statistics | IVW               | Ever smokers          | 0.017     | -16.33, 16.37 | 0.997                | 38,181   |
|                     |                           | UK Biobank              | Unweighted score  | Former smokers        | -0.021    | -0.08, 0.04   | 0.519                | 73,967   |
|                     |                           |                         |                   | Current smokers       | -0.038    | -0.13, 0.05   | 0.419                | 22,340   |
|                     |                           |                         |                   |                       | <b>OR</b> | <b>95% CI</b> | <b>P-value</b>       | <b>N</b> |
| <b>Neuroticism</b>  | <b>Smoking cessation</b>  | GWAS summary statistics | IVW               | Ever smokers          | 0.797     | 0.43, 1.47    | 0.423                | 41,278   |
|                     |                           | UK Biobank              | Unweighted score  | Ever smokers          | 0.997     | 0.99, 1.00    | 0.272                | 144,119  |
| <b>Extraversion</b> | <b>Smoking cessation</b>  | GWAS summary statistics | IVW               | Ever smokers          | 0.586     | 0.07, 4.76    | 0.387                | 41,278   |
|                     |                           | UK Biobank              | Unweighted score  | Ever smokers          | 0.989     | 0.98, 1.00    | 0.057                | 150,294  |

Figure 1. Directed acyclic graph illustrating Mendelian randomization. In this model, allelic risk scores associated with smoking initiation are calculated and used to assess the association of smoking initiation with neuroticism levels.

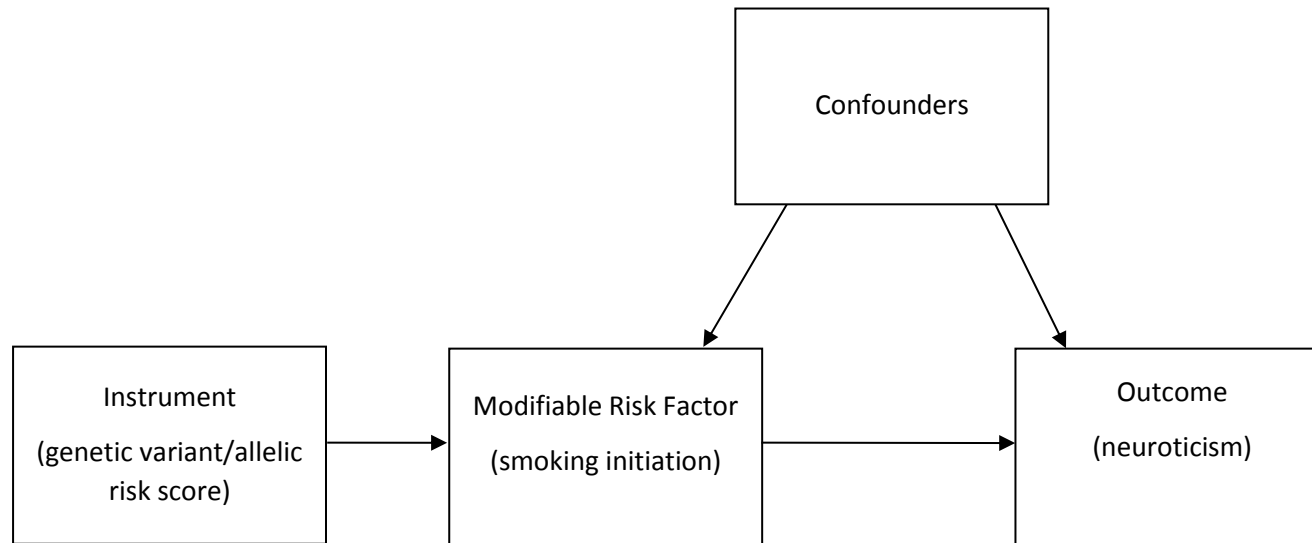

Source: https://www.biorxiv.org/content/10.1101/246181v1.full.pdf
